# Supplementary material for: Polymorphisms of CUL5 Are Associated with CD4+ T Cell Loss in HIV-1 Infected Individuals
Source: PLoS Genet. 2007 Jan 26;3(1):e19. doi: 10.1371/journal.pgen.0030019 (PMC1781497; doi:10.1371/journal.pgen.0030019)
Supplement: Table S4 — (17 KB XLS) [file pgen.0030019.st004.xls]

## Sheet: S.tab4_eaSNP
Table S4. COX model analysis of CUL5 SNPs in EA*
SNP	Endpoint	N	RH	RH_L95	RH_U95	P	Q
SNP1	CD4<200	666	0.973357	0.813231	1.16501	0.768393
	AIDS-93	670	0.989812	0.835144	1.17313	0.905974
	AIDS-87	670	1.06335	0.8697	1.30011	0.549281
SNP4	CD4<200	661	0.780256	0.606575	1.00367	0.0534257
	AIDS-93	665	0.775386	0.618709	0.971739	0.0271823	0.0506561
	AIDS-87	665	0.869788	0.668123	1.13232	0.299932
SNP5	CD4<200	672	1.01162	0.863803	1.18474	0.886002
	AIDS-93	676	1.01403	0.87723	1.17216	0.850565
	AIDS-87	676	0.964906	0.809098	1.15072	0.690937
SNP6	CD4<200	672	1.07959	0.858432	1.35772	0.512605
	AIDS-93	676	1.01392	0.818912	1.25538	0.899038
	AIDS-87	676	1.03535	0.805882	1.33015	0.785829
SNP7	CD4<200	656	1.1354	0.936565	1.37645	0.196091
	AIDS-93	660	1.23588	1.03293	1.4787	0.0206688	0.0434877
	AIDS-87	660	1.08608	0.87169	1.35321	0.461722
SNP10	CD4<200	660	0.999087	0.858715	1.16241	0.990565
	AIDS-93	664	0.992159	0.864618	1.13851	0.910721
	AIDS-87	664	0.977589	0.829294	1.1524	0.787131
SNP12	CD4<200	646	1.18301	0.992192	1.41053	0.0611205
	AIDS-93	650	1.20068	1.02216	1.41037	0.0259564	0.0504534
	AIDS-87	650	1.05697	0.872421	1.28056	0.571446
* Analyses were done for additive model and unadjusted; In EA, SNP3, 5, 8 and 11 were identical in EA and SNP2 is absent in EA. RH: relative hazards; CI: confidence interval; L95 and U95, lower and upper limit of 95% CI;Q values: measures for the false discovery rate.
